# Supplementary material
Source: PubMed Central journal article supplement (PMC9132935)

Full and uncropped western blot for **FIGURE 3**

**A**

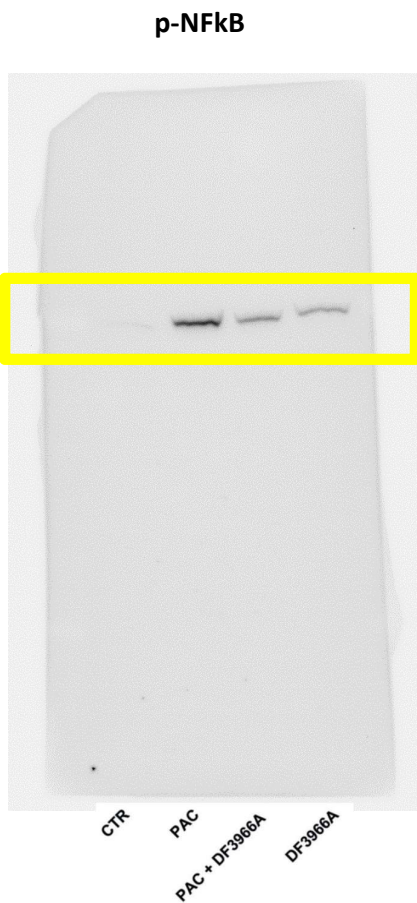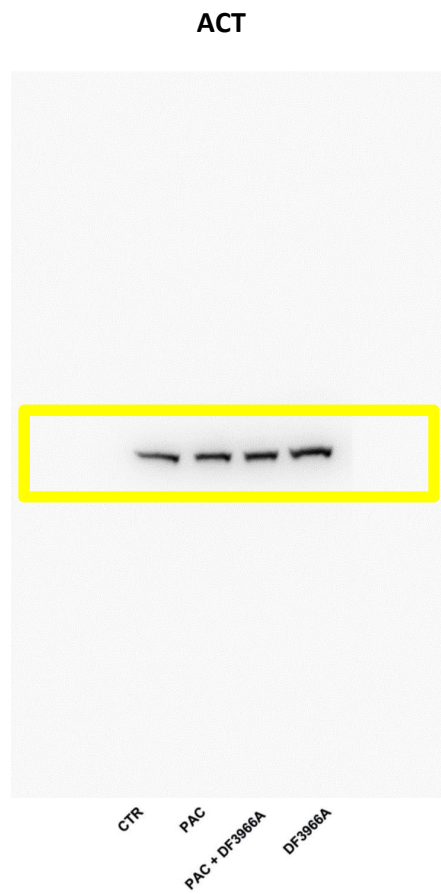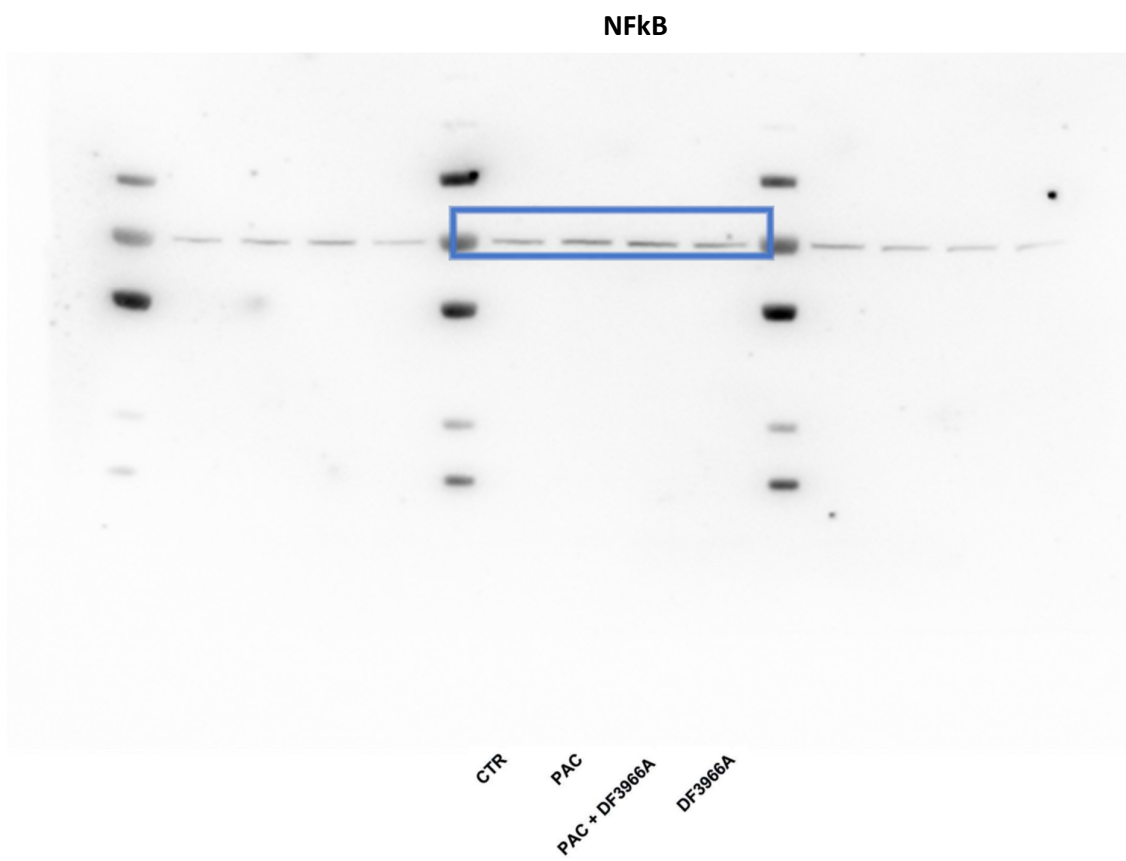

# B

p-JUN

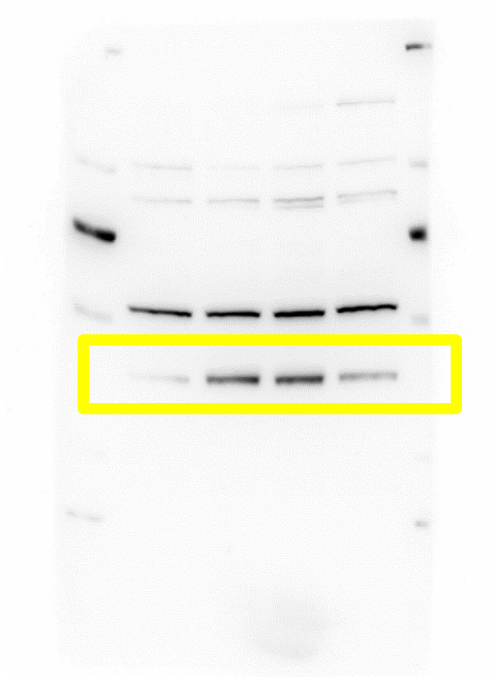

CTR  
PAC  
PAC + DF3986A  
DF3986A

ACT

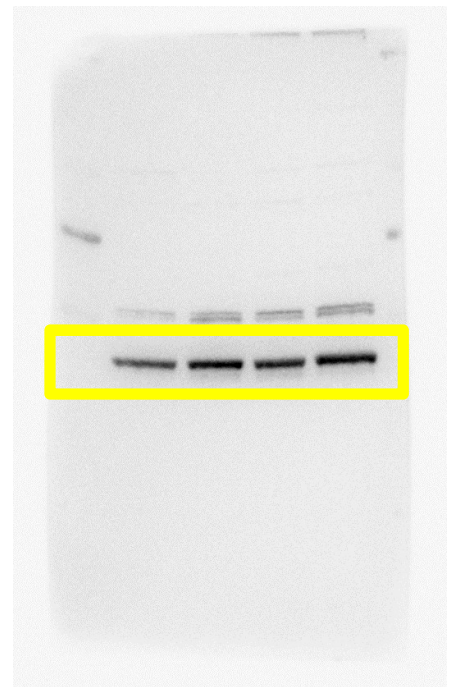

CTR  
PAC  
PAC + DF3986A  
DF3986A

JUN

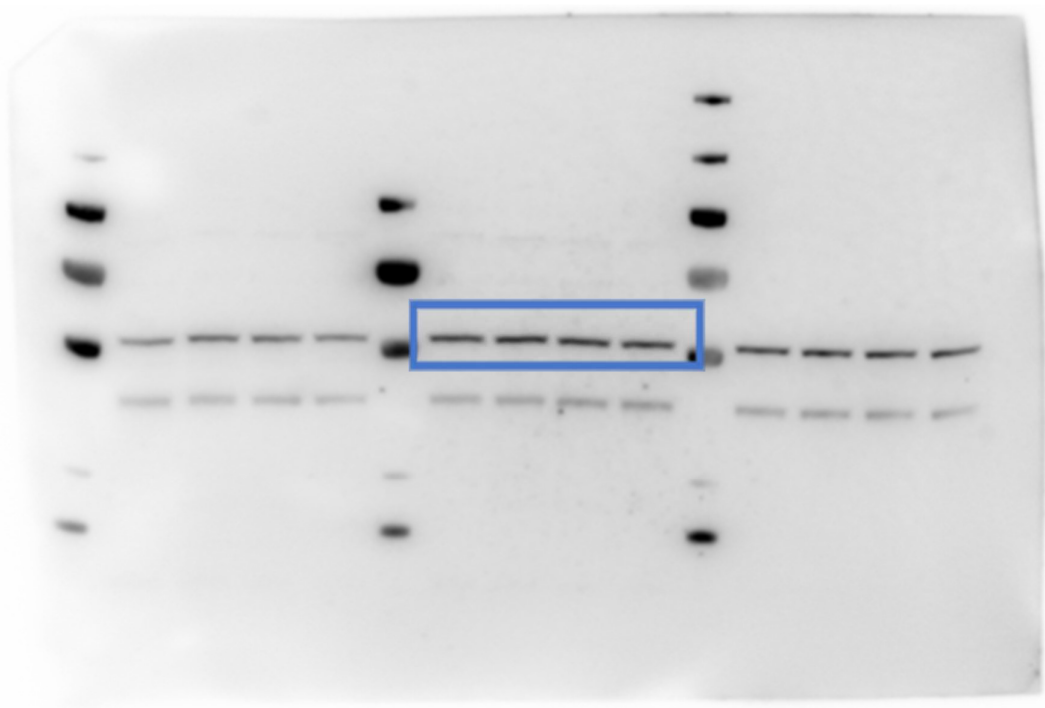

CTR  
PAC  
PAC + DF3986A  
DF3986A

C

p-c-fos

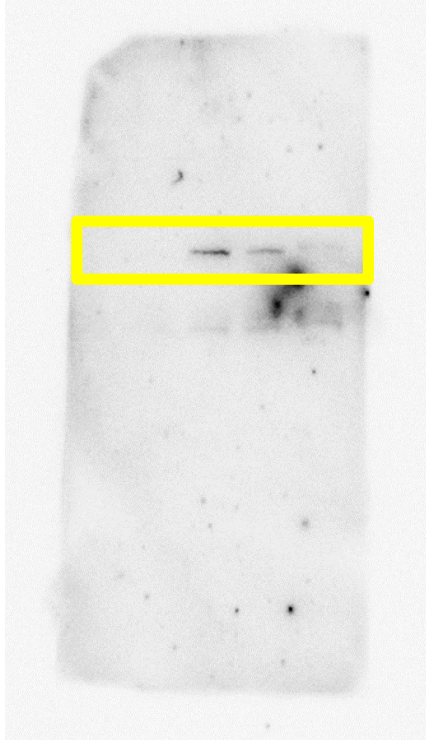

ACT

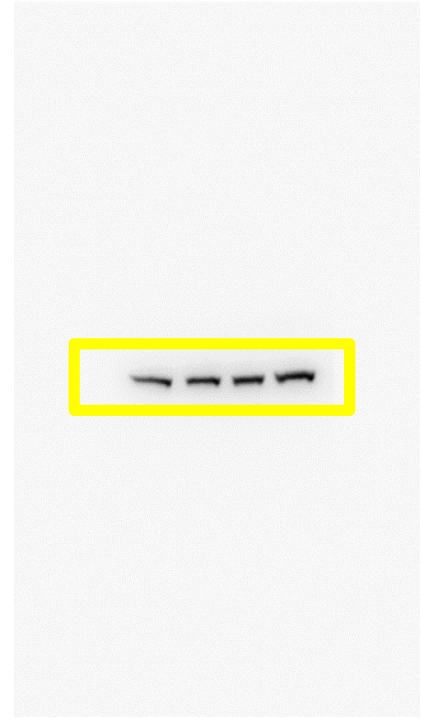

CTR

PAC

PAC + DF3986A

DF3986A

CTR

PAC

PAC + DF3986A

DF3986A

c-fos

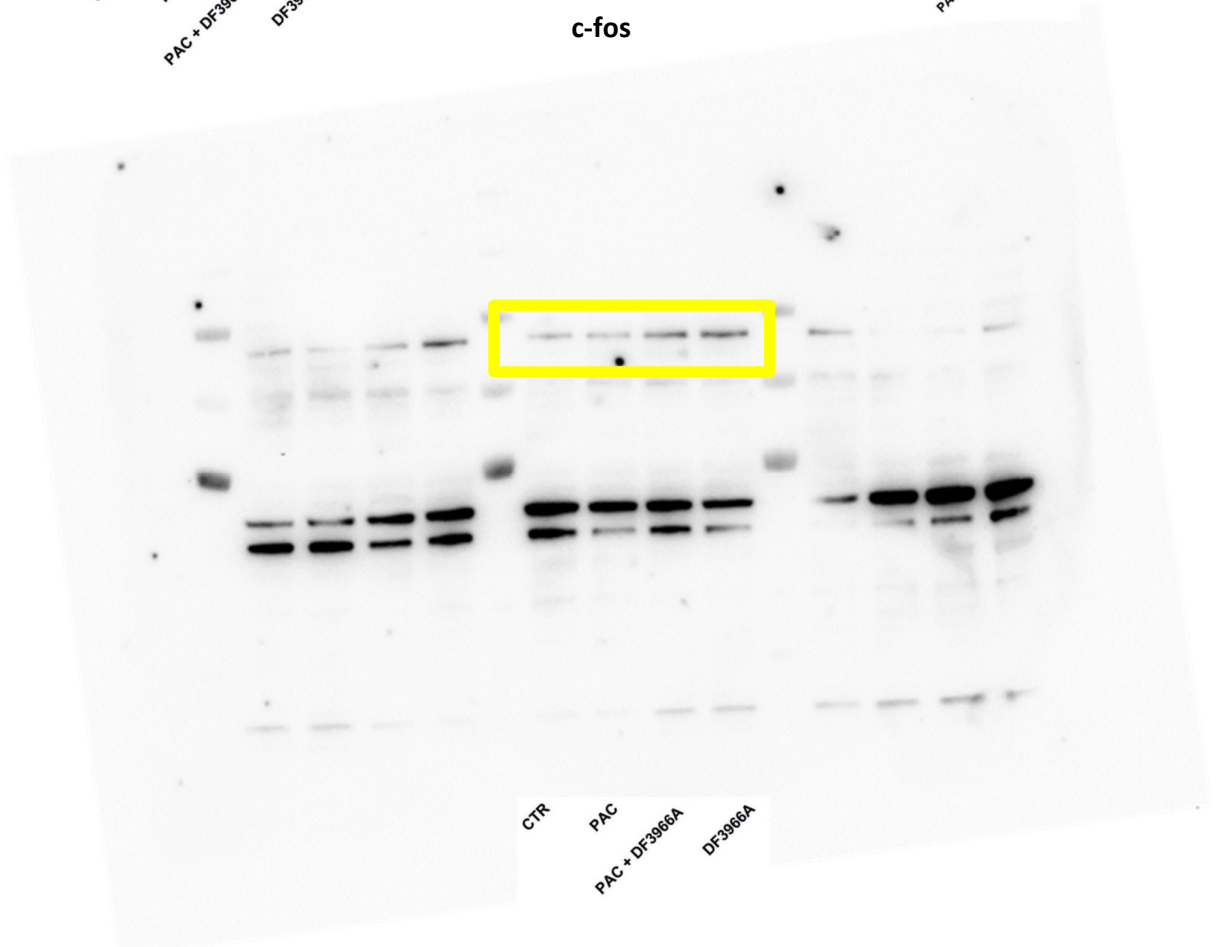

CTR

PAC

PAC + DF3986A

DF3986A

# D

p-p38

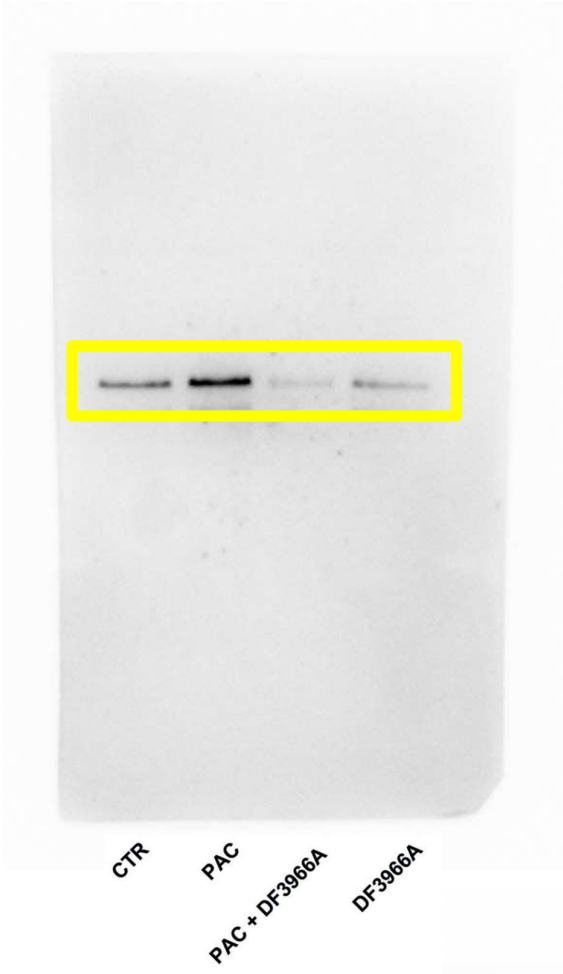

ACT

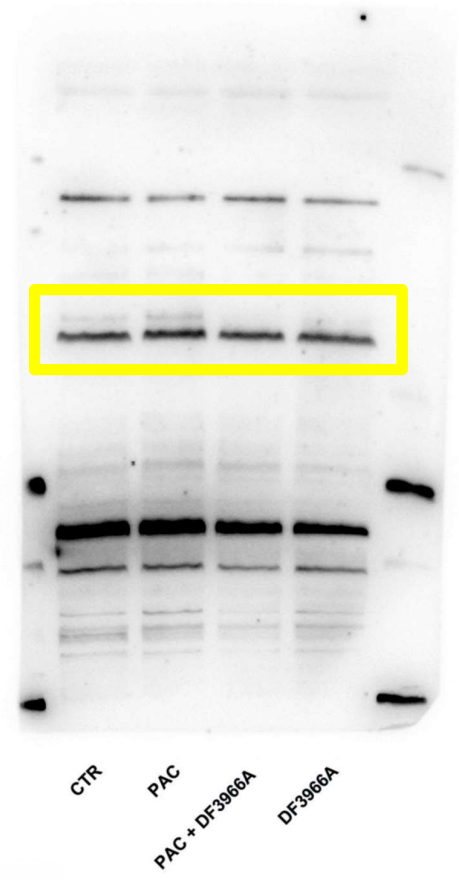

p38

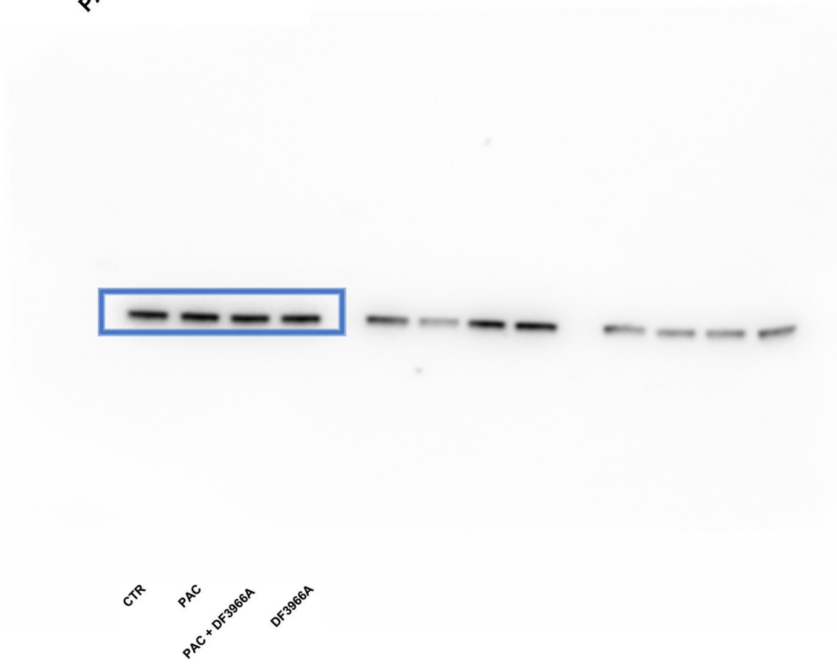

# E

p-MAPK6

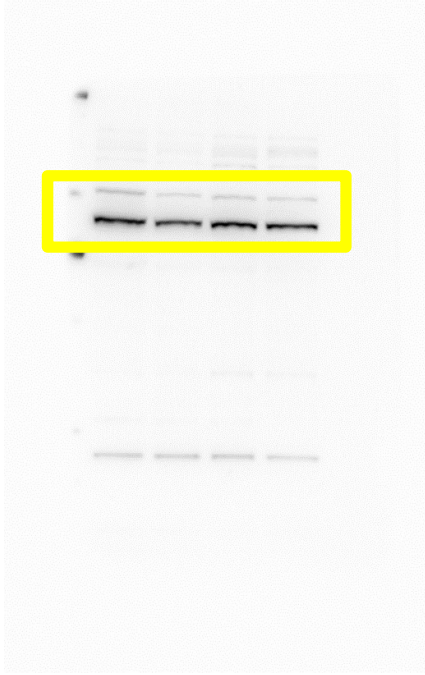

CTR  
PAC  
PAC + DF3986A  
DF3986A

ACT

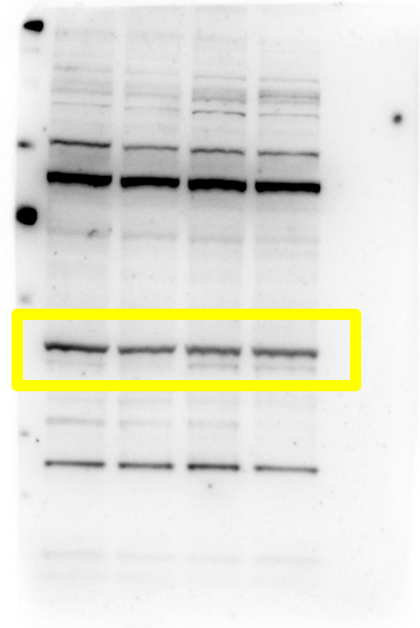

CTR  
PAC  
PAC + DF3986A  
DF3986A

MAPK6

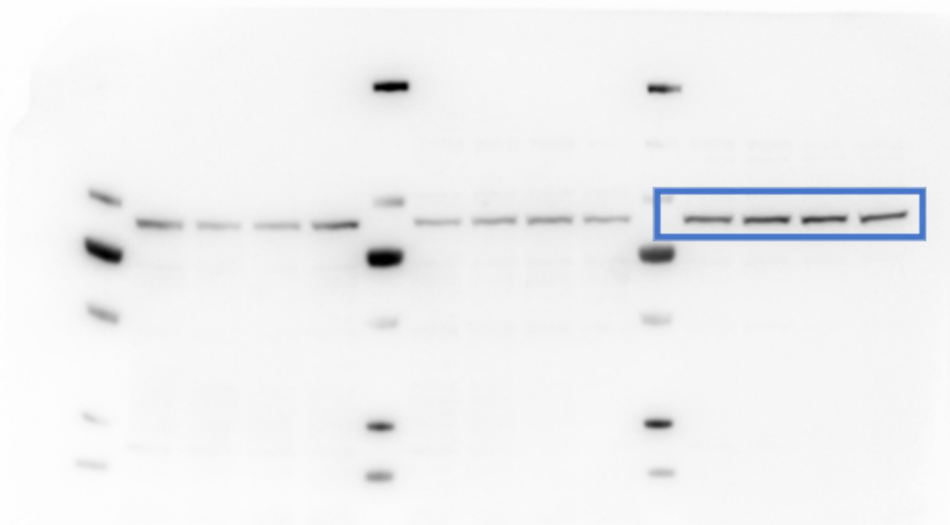

CTR  
PAC  
PAC + DF3986A  
DF3986A

**A**

**p-Cortactin**

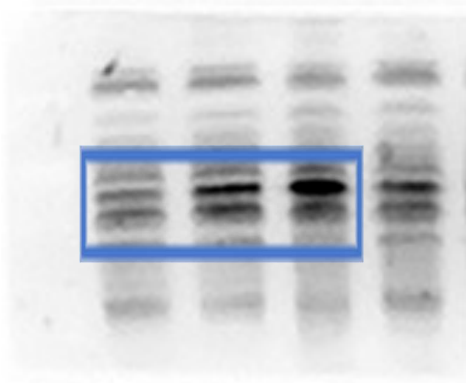

CTR PAC C5a

**Cortactin**

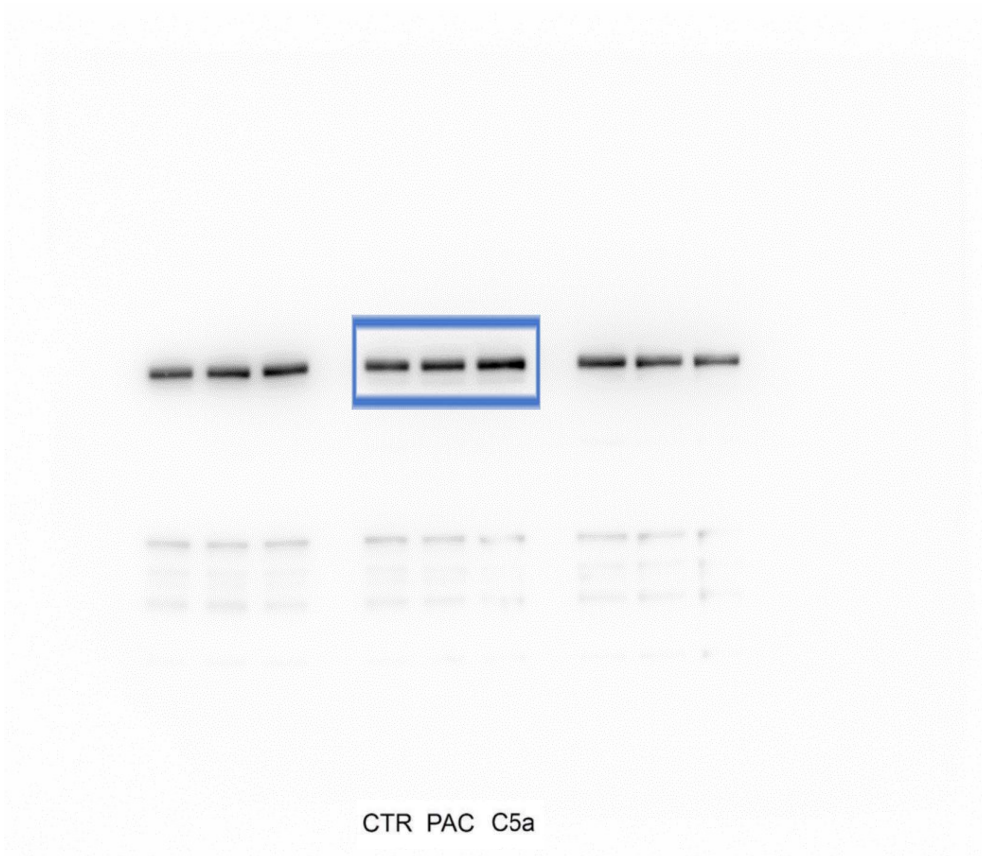

CTR PAC C5a

**Actin**

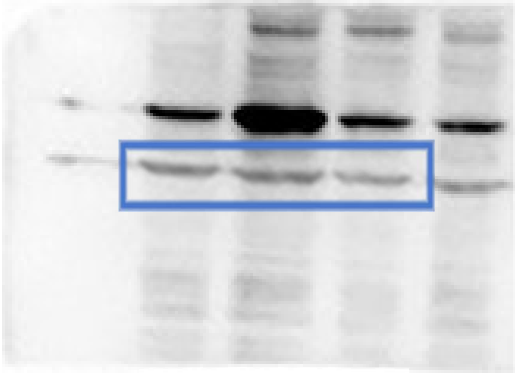

CTR PAC C5a

---

**B**

**p-Fak**

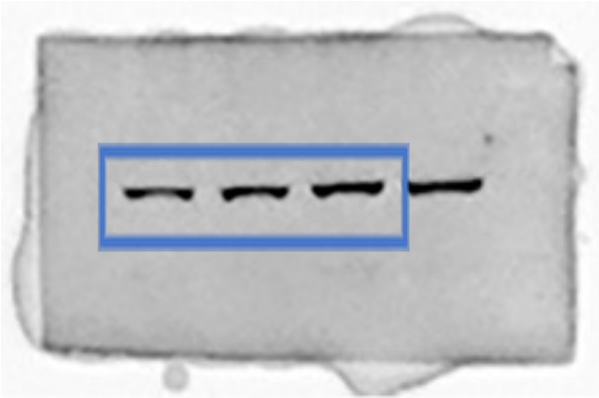

CTR PAC C5a

# Fak

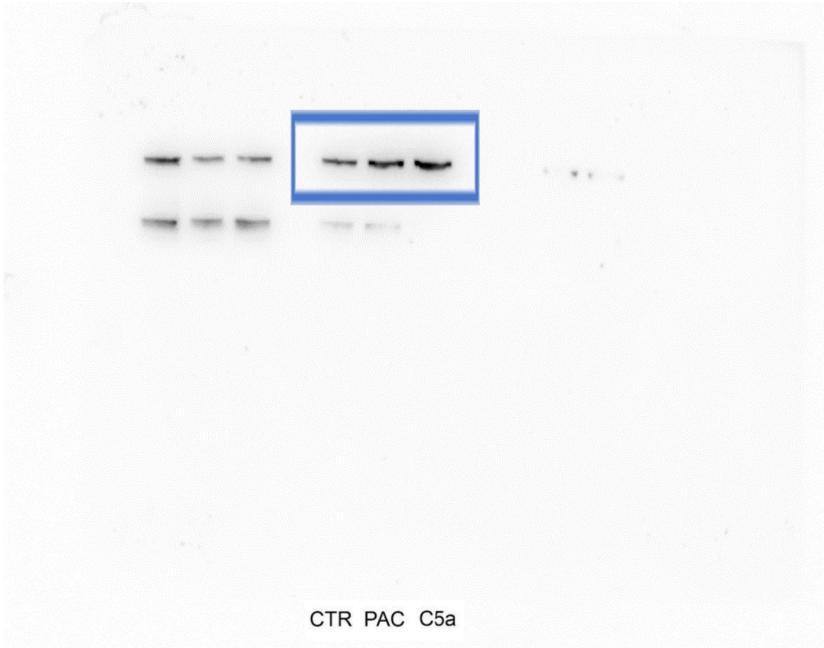

# Actin

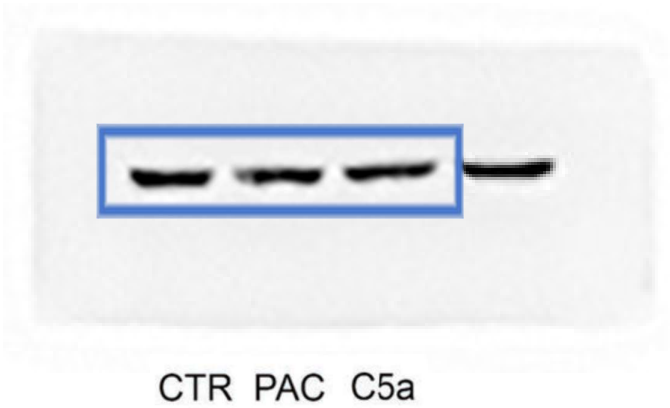



C

p-Jak

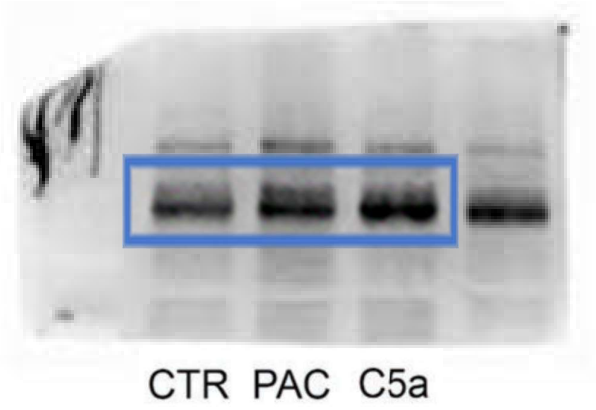

Jak

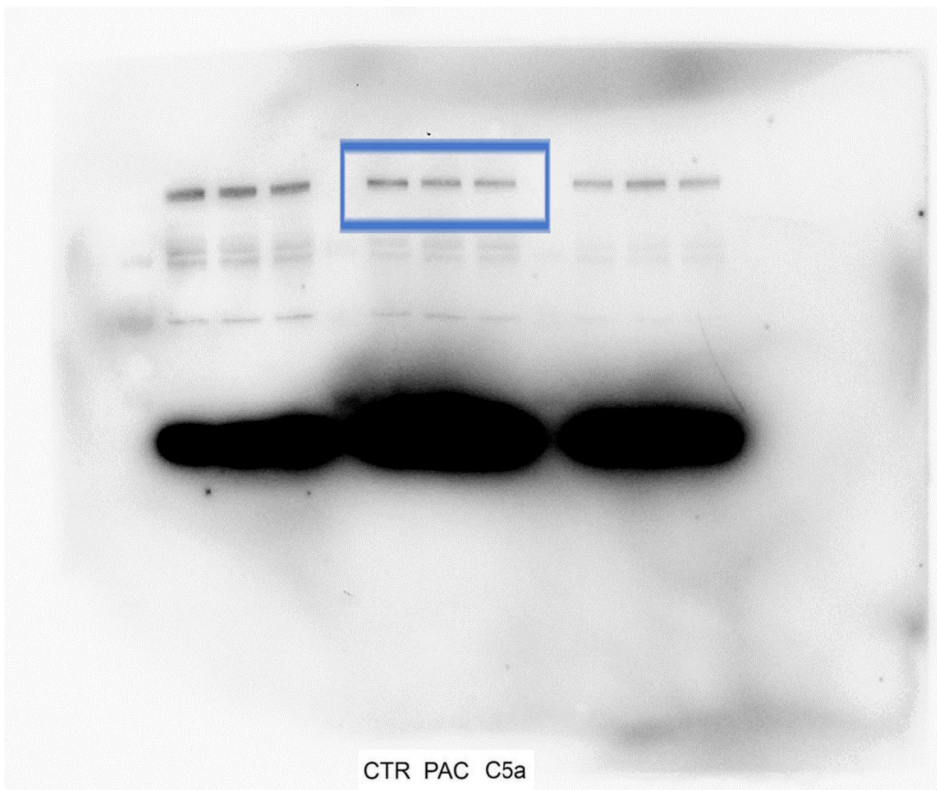

**Actin**

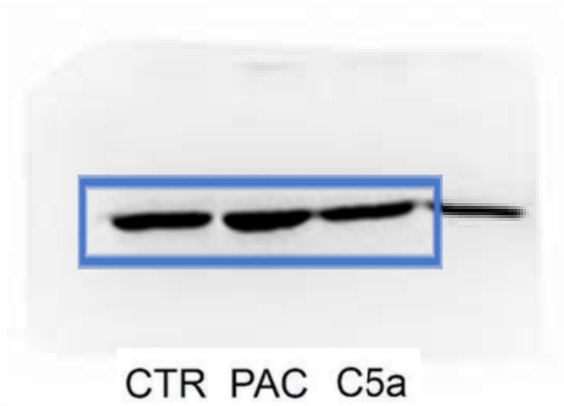

---

**D**

**p-Stat3**

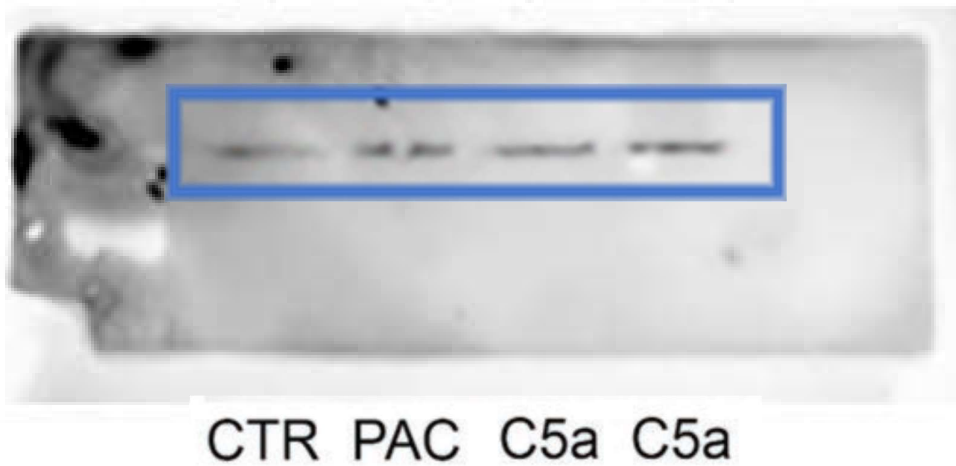

# Stat3

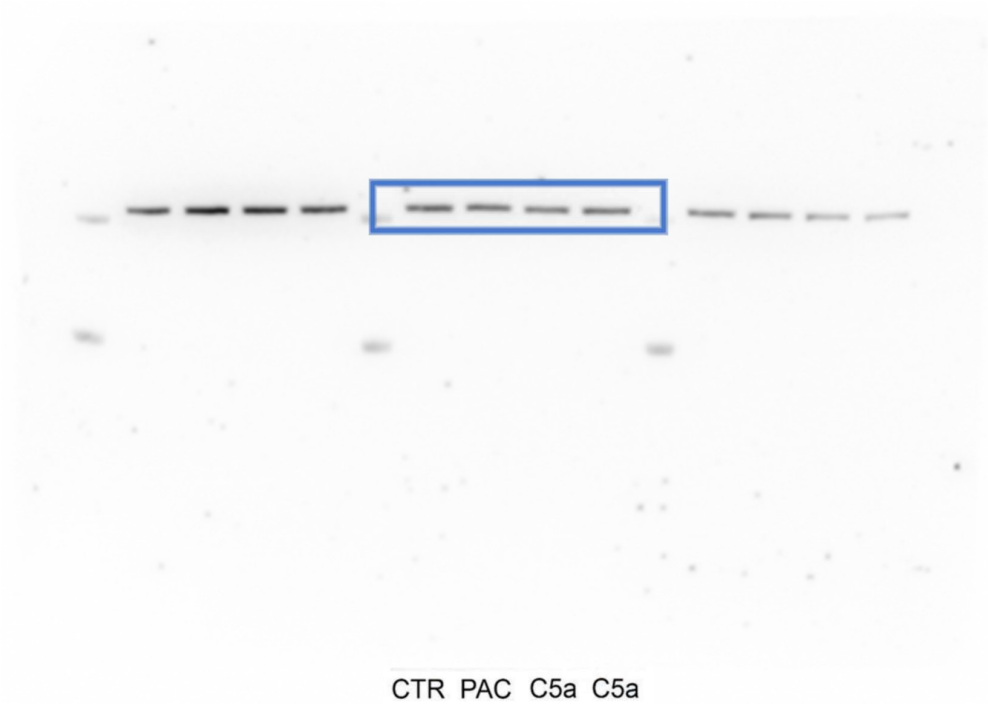

# Actin

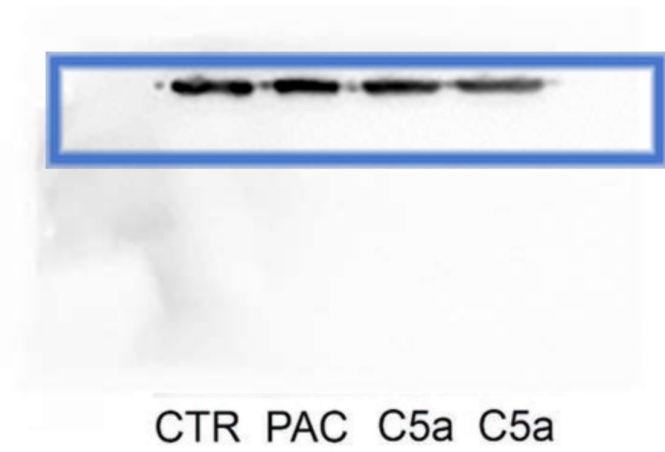

**E**

**p-Fak**

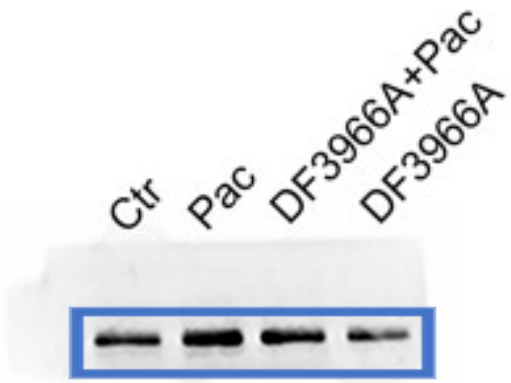

**Fak**

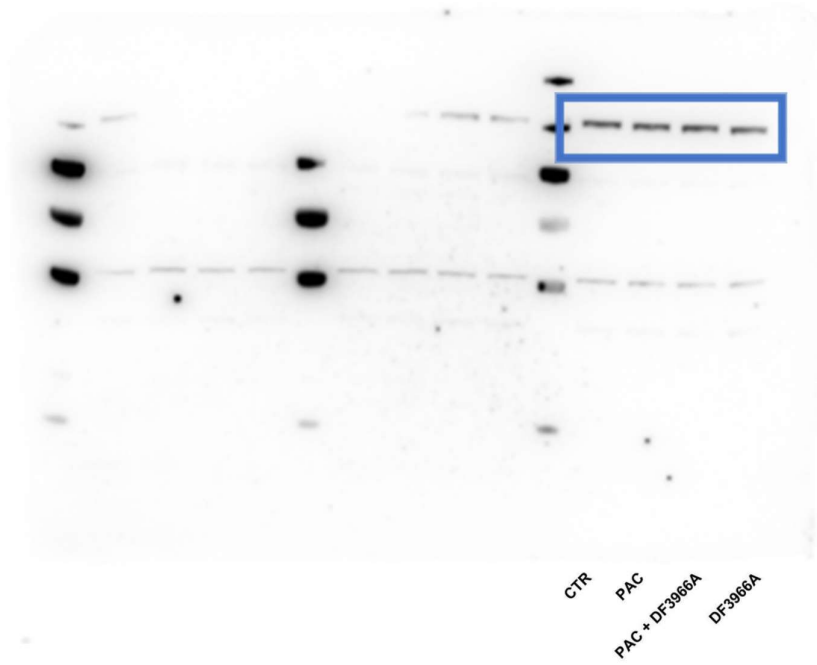

# p-Cortactin

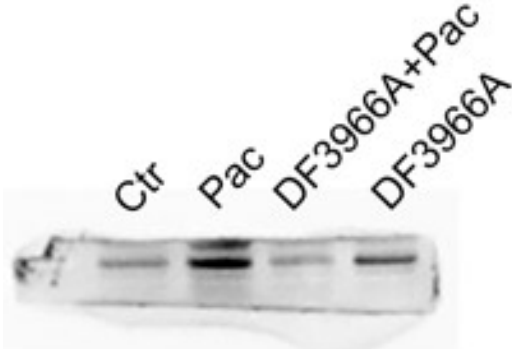

# Cortactin

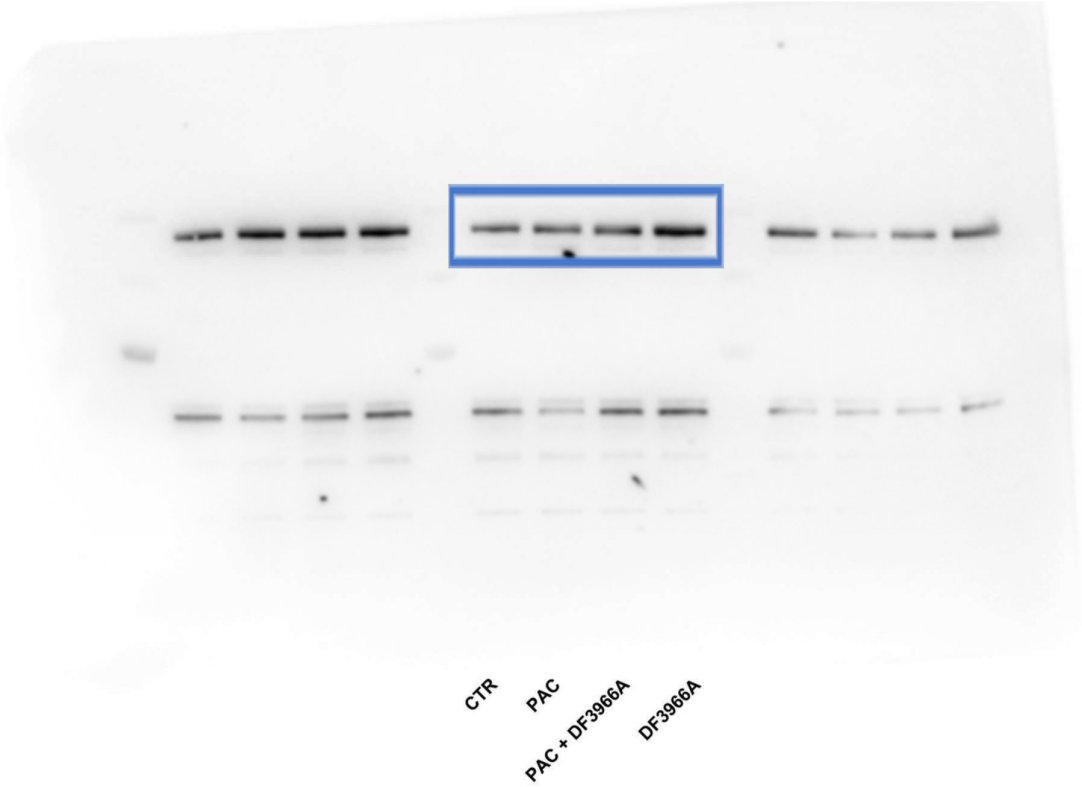

# Actin

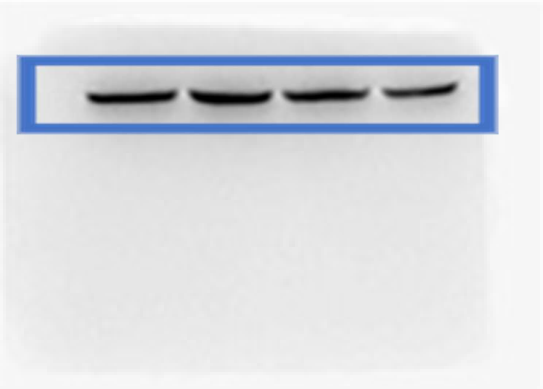

CTR  
PAC  
PAC + DF3966A  
DF3966A

---

# F

# p-Jak

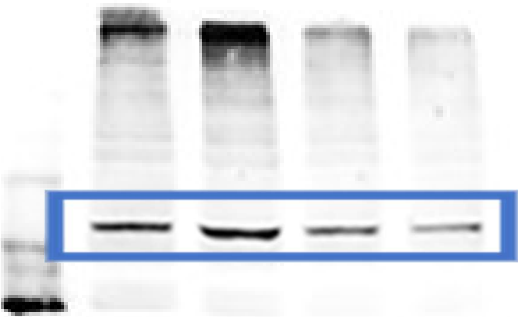

CTR  
PAC  
PAC + DF3966A  
DF3966A

# Jak

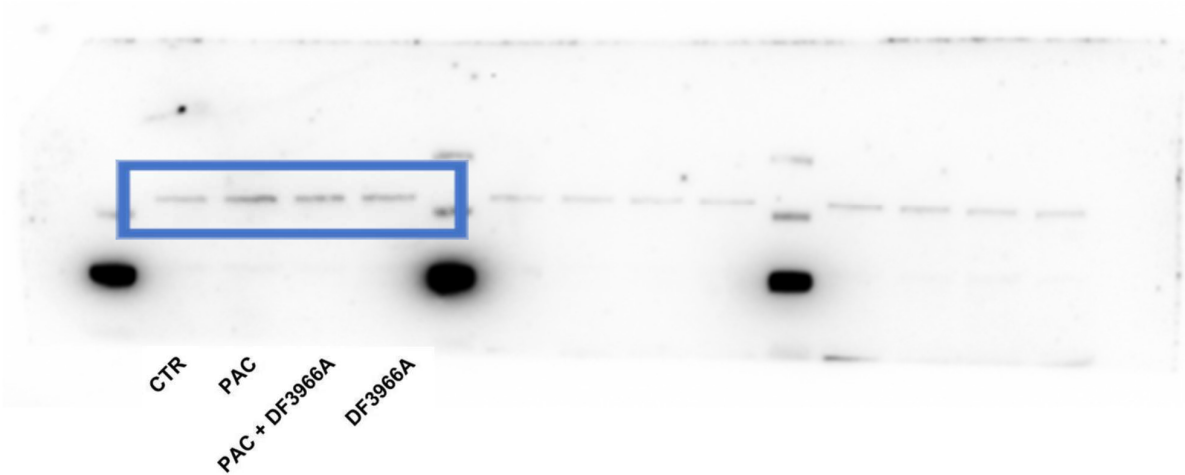

# Actin

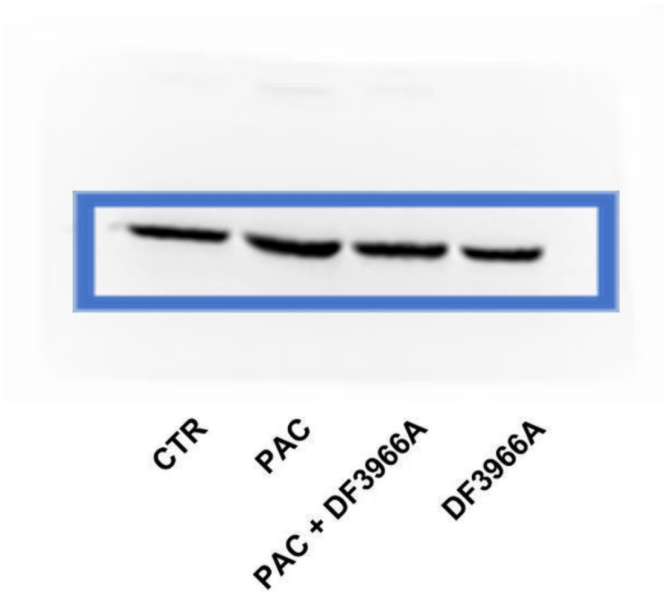

# p-Stat3

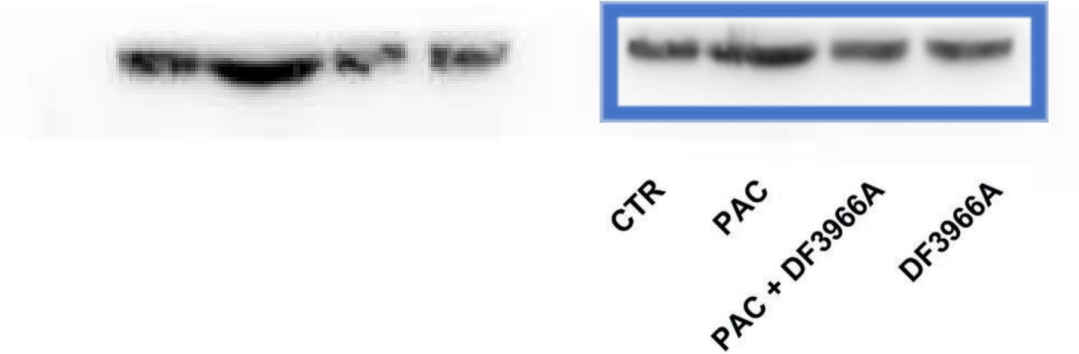

# Stat3

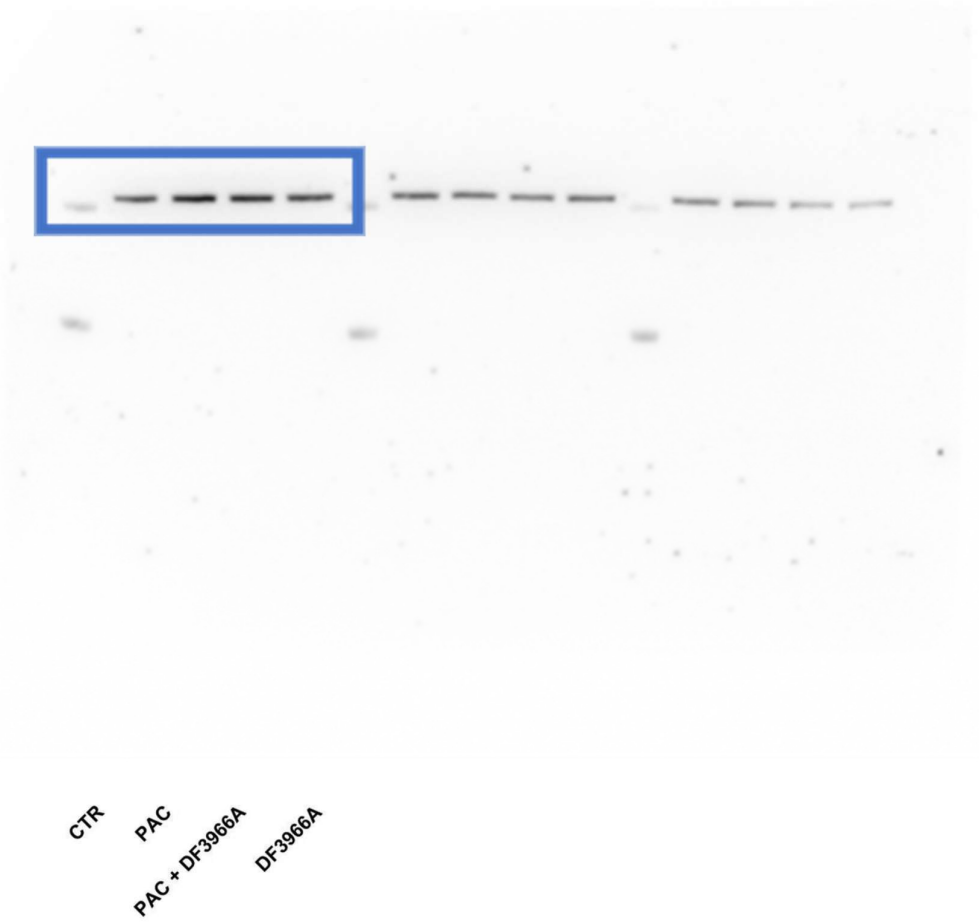



# Actin

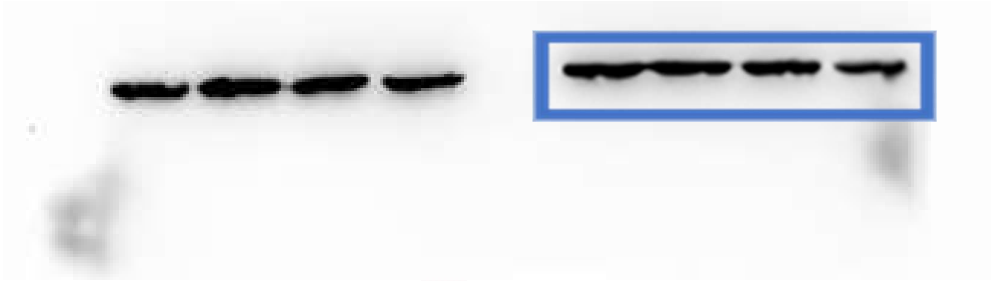

CTR  
PAC  
PAC + DF396A  
DF396A

**A**

**p-NFkB**

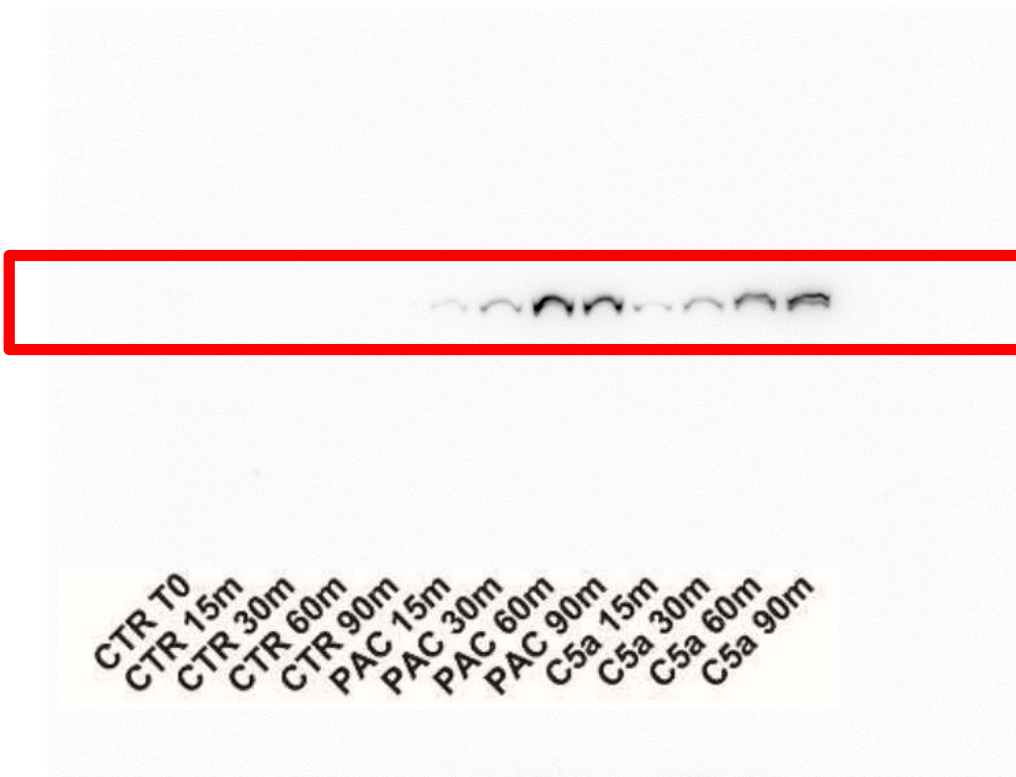

**Actin**

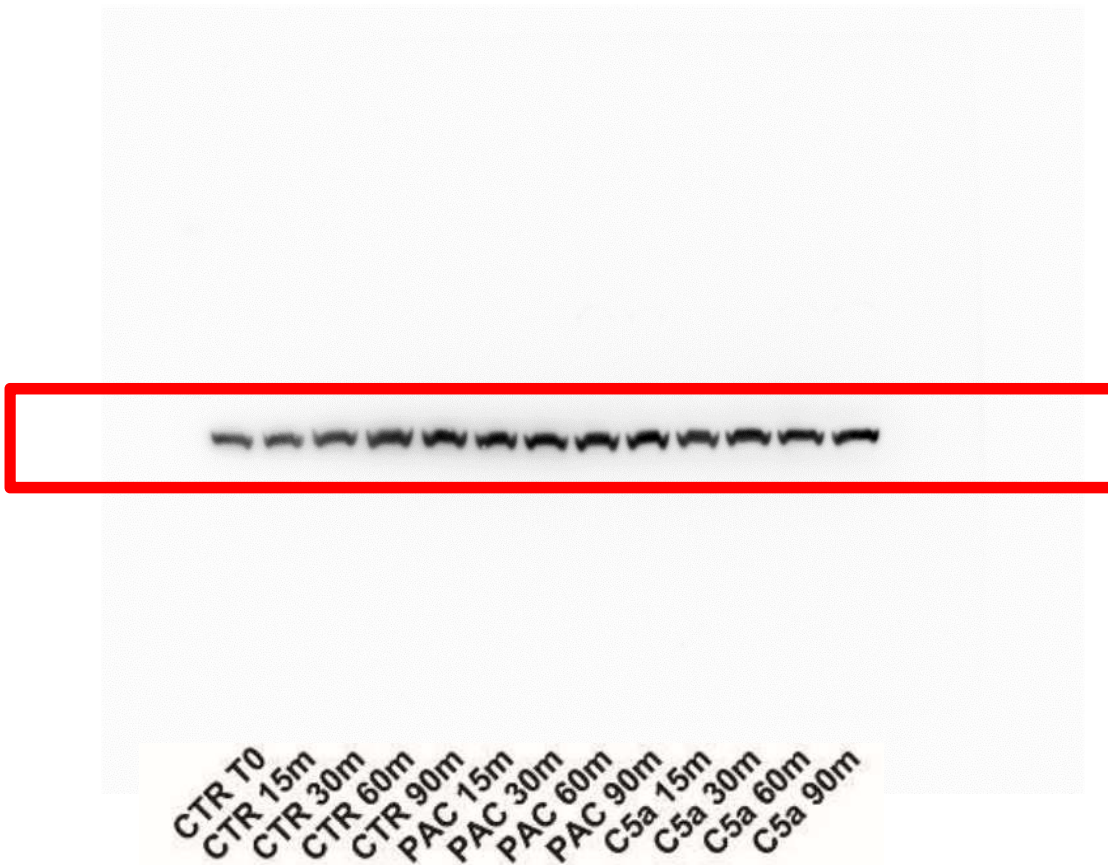

**p-Jun**

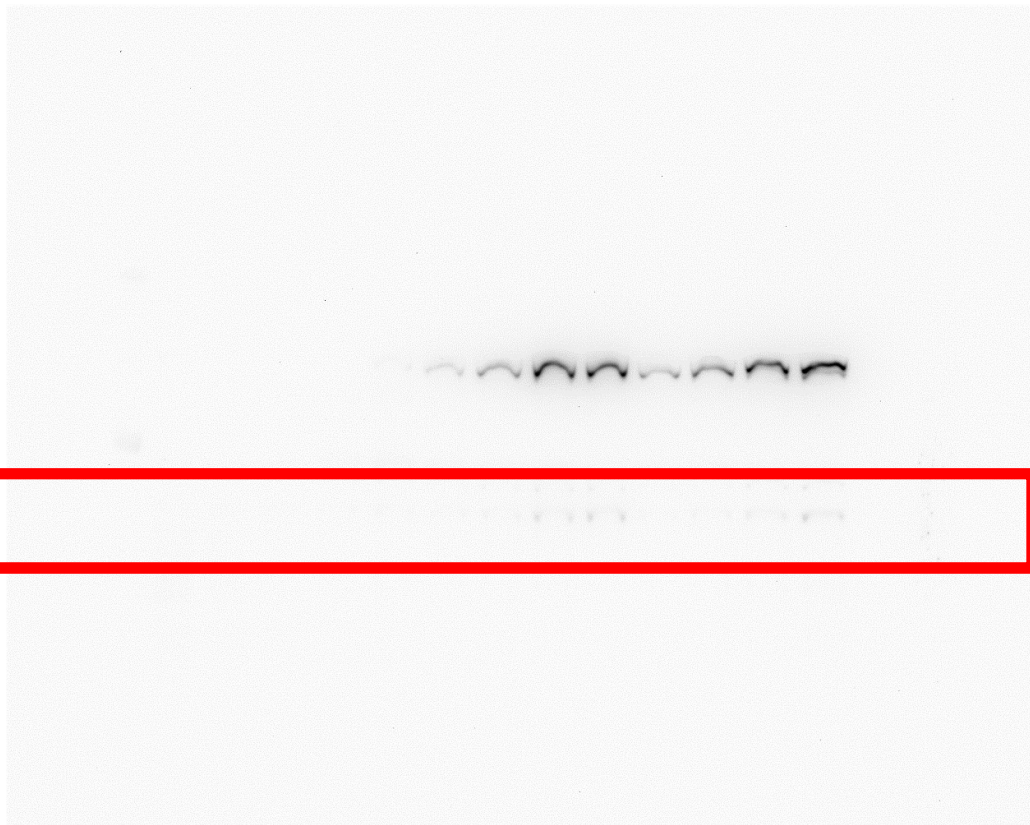

CTR T0  
CTR 15m  
CTR 30m  
CTR 60m  
CTR 90m  
PAC 15m  
PAC 30m  
PAC 60m  
PAC 90m  
C5a 15m  
C5a 30m  
C5a 60m  
C5a 90m

**Actin**

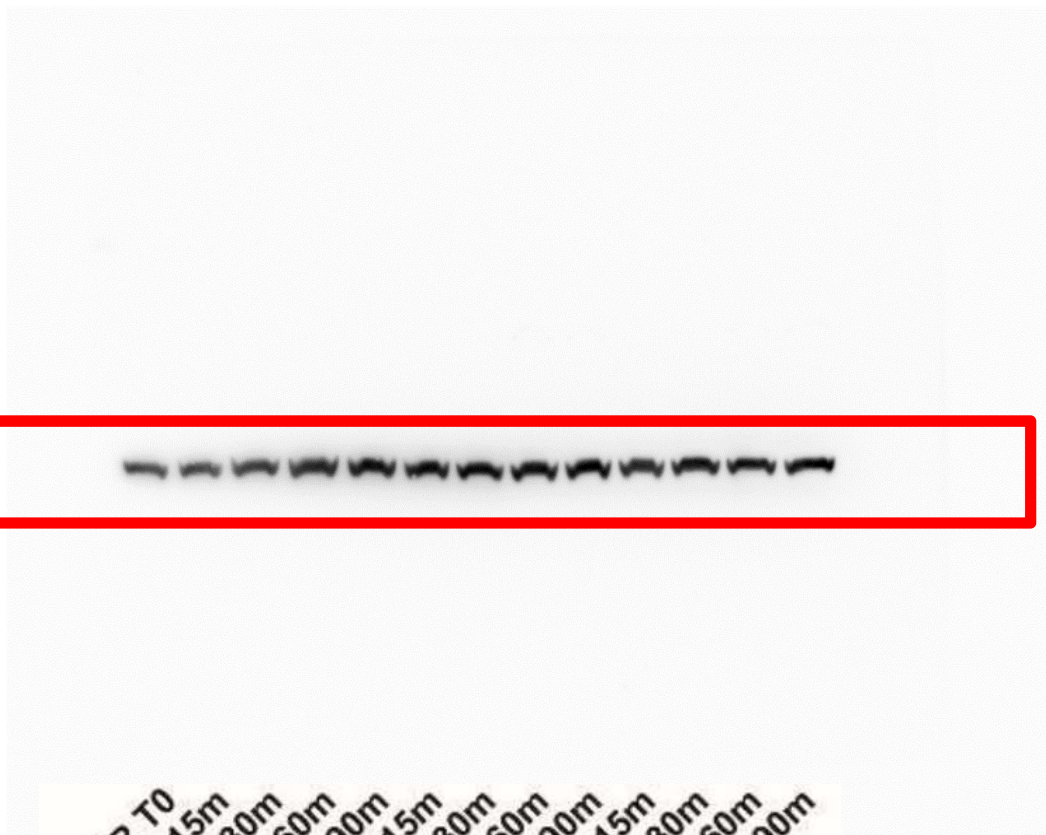

CTR T0  
CTR 15m  
CTR 30m  
CTR 60m  
CTR 90m  
PAC 15m  
PAC 30m  
PAC 60m  
PAC 90m  
C5a 15m  
C5a 30m  
C5a 60m  
C5a 90m

**p-C-FOS**

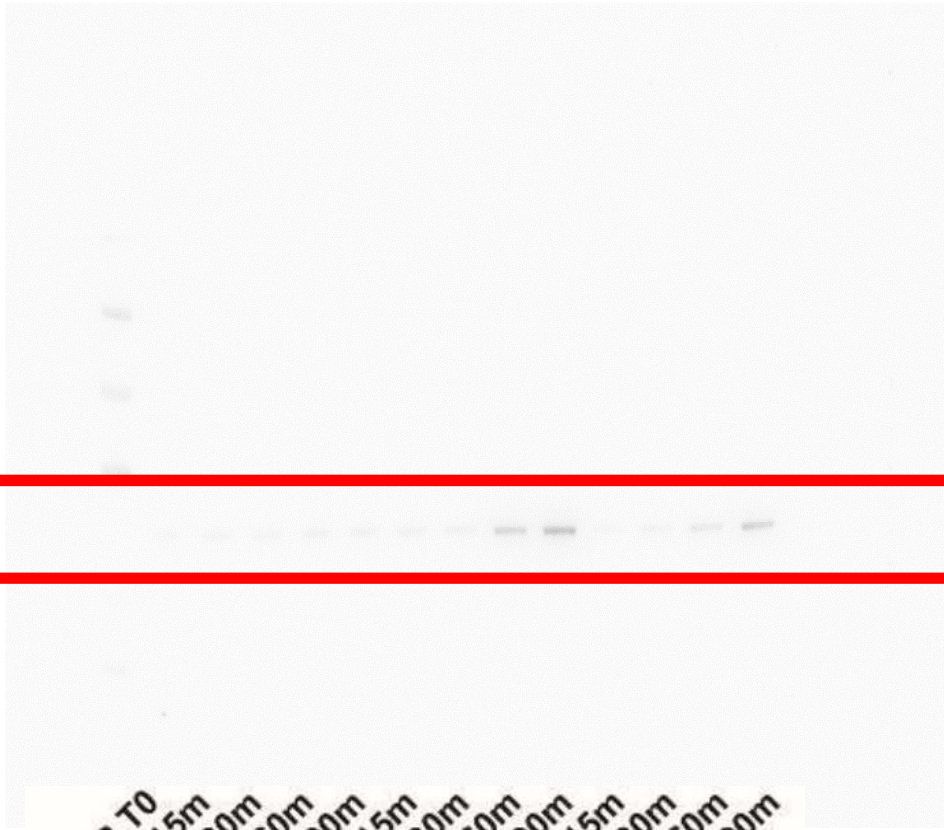

CTR T0  
CTR 15m  
CTR 30m  
CTR 60m  
CTR 90m  
PAC 15m  
PAC 30m  
PAC 60m  
PAC 90m  
C5a 15m  
C5a 30m  
C5a 60m  
C5a 90m

**Actin**

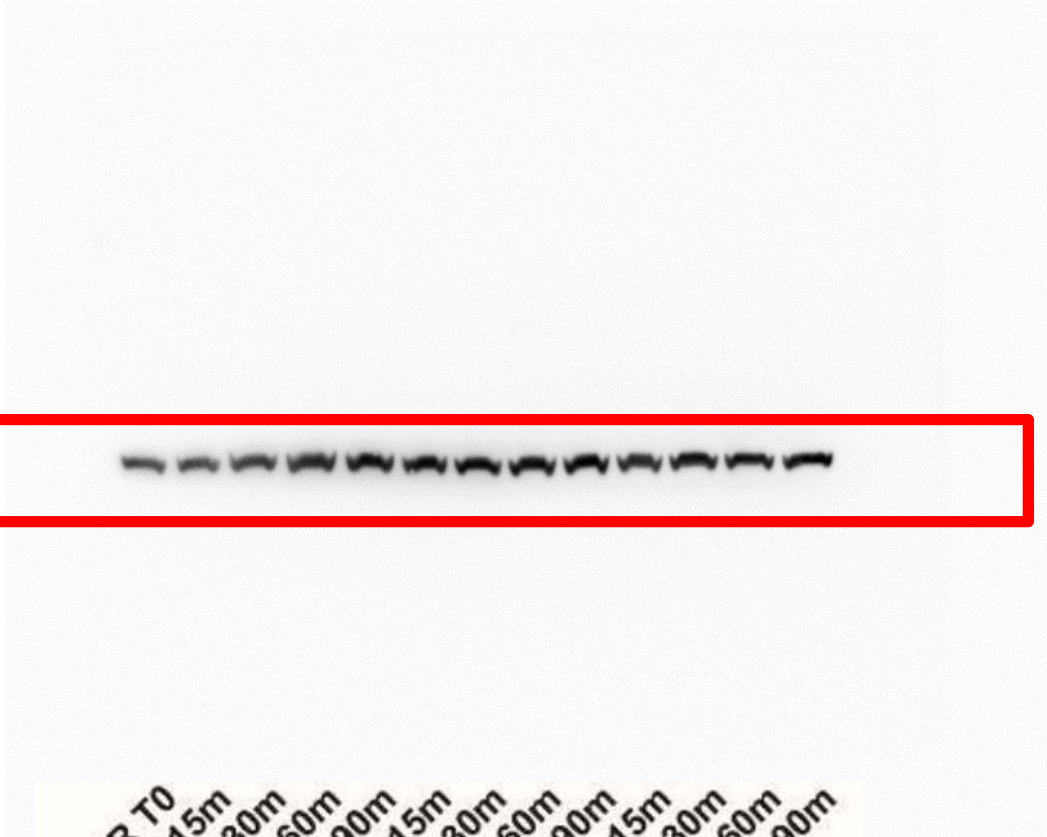

CTR T0  
CTR 15m  
CTR 30m  
CTR 60m  
CTR 90m  
PAC 15m  
PAC 30m  
PAC 60m  
PAC 90m  
C5a 15m  
C5a 30m  
C5a 60m  
C5a 90m

p-P38

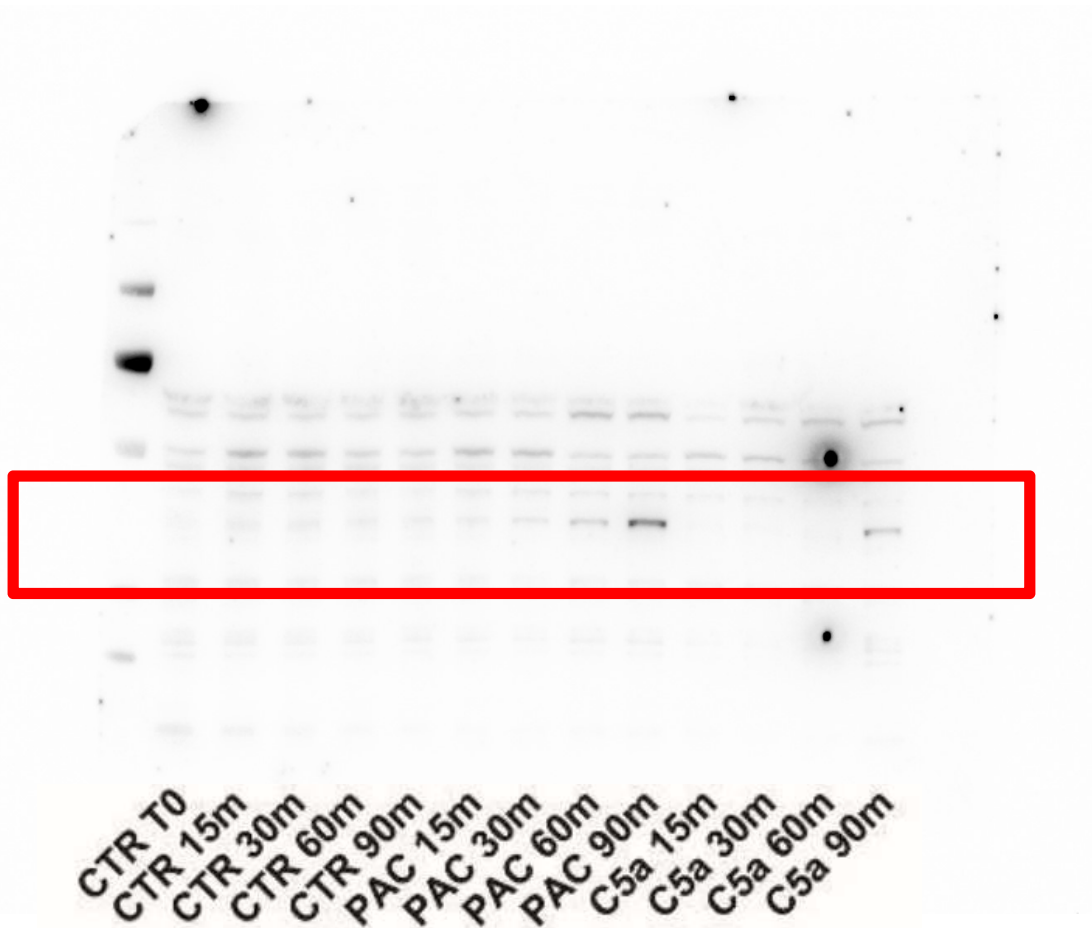

Actin

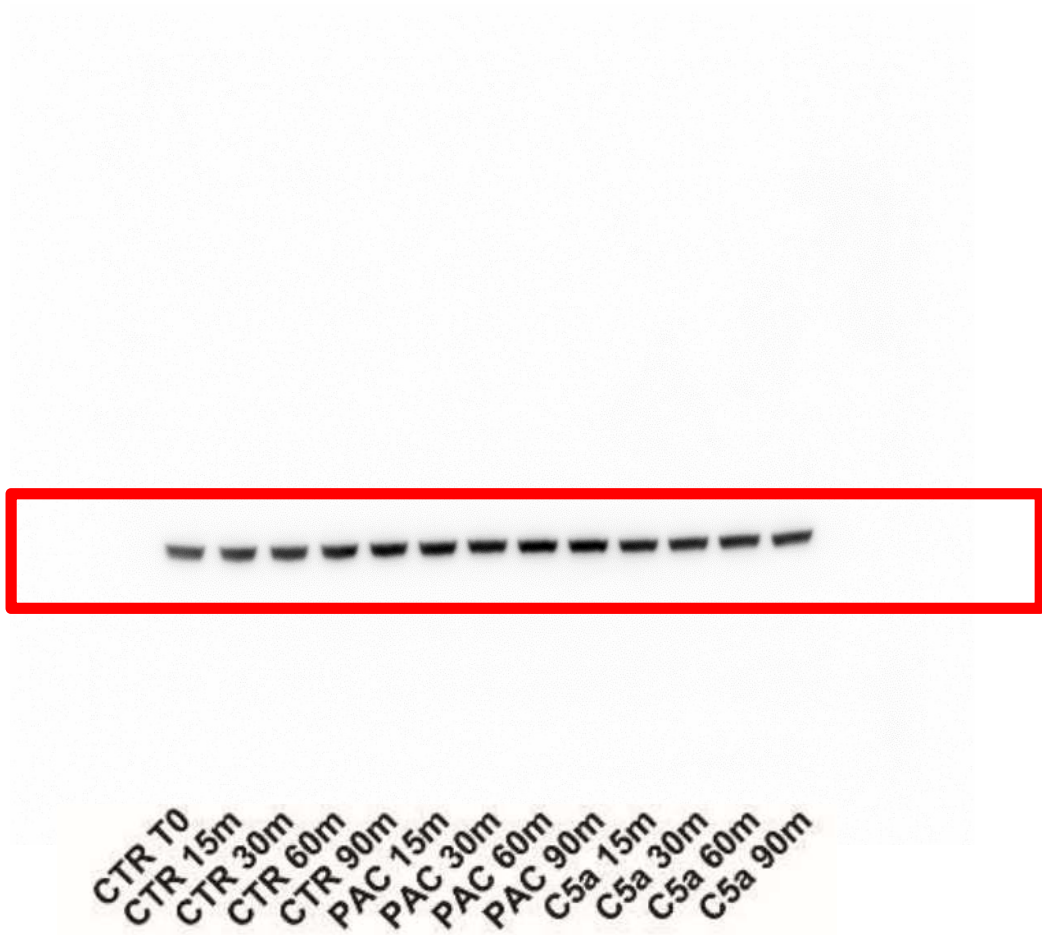

**B**

**p-Fak**

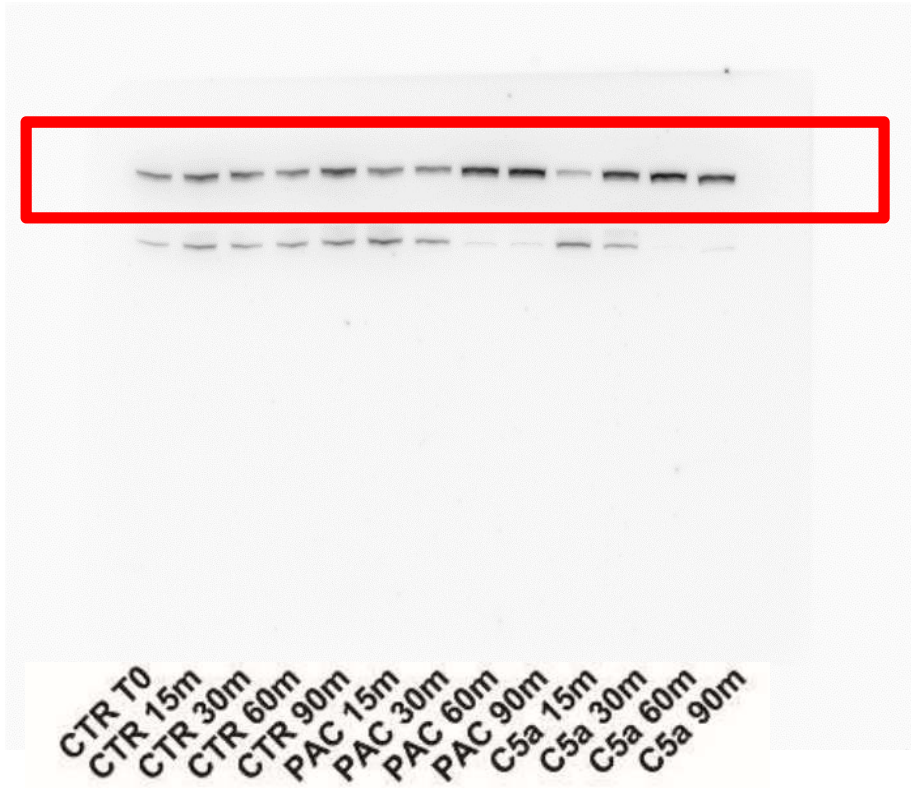

**Actin**

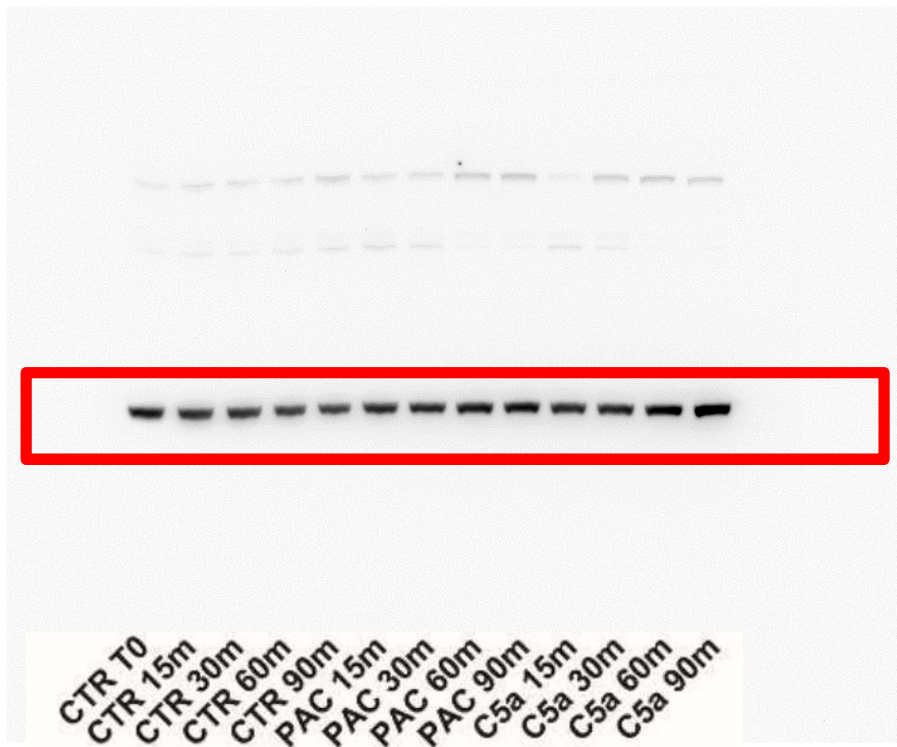

# p-CORT

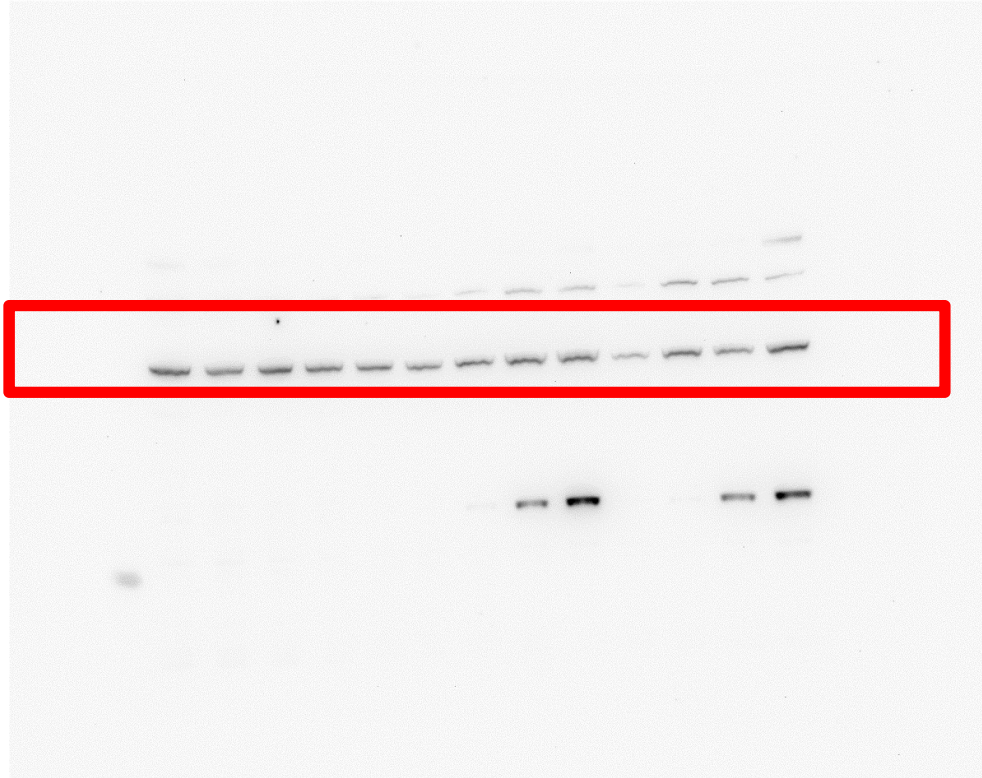

# Actin

CTR T0  
CTR 15m  
CTR 30m  
CTR 60m  
CTR 90m  
PAC 15m  
PAC 30m  
PAC 60m  
PAC 90m  
C5a 15m  
C5a 30m  
C5a 60m  
C5a 90m

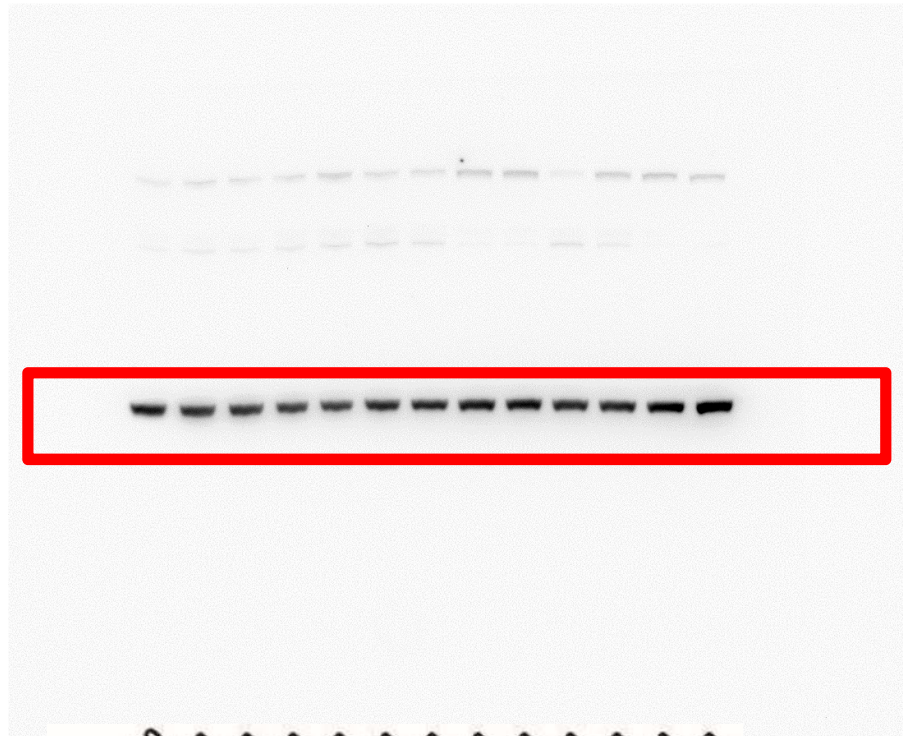

CTR T0  
CTR 15m  
CTR 30m  
CTR 60m  
CTR 90m  
PAC 15m  
PAC 30m  
PAC 60m  
PAC 90m  
C5a 15m  
C5a 30m  
C5a 60m  
C5a 90m

# p-JAK

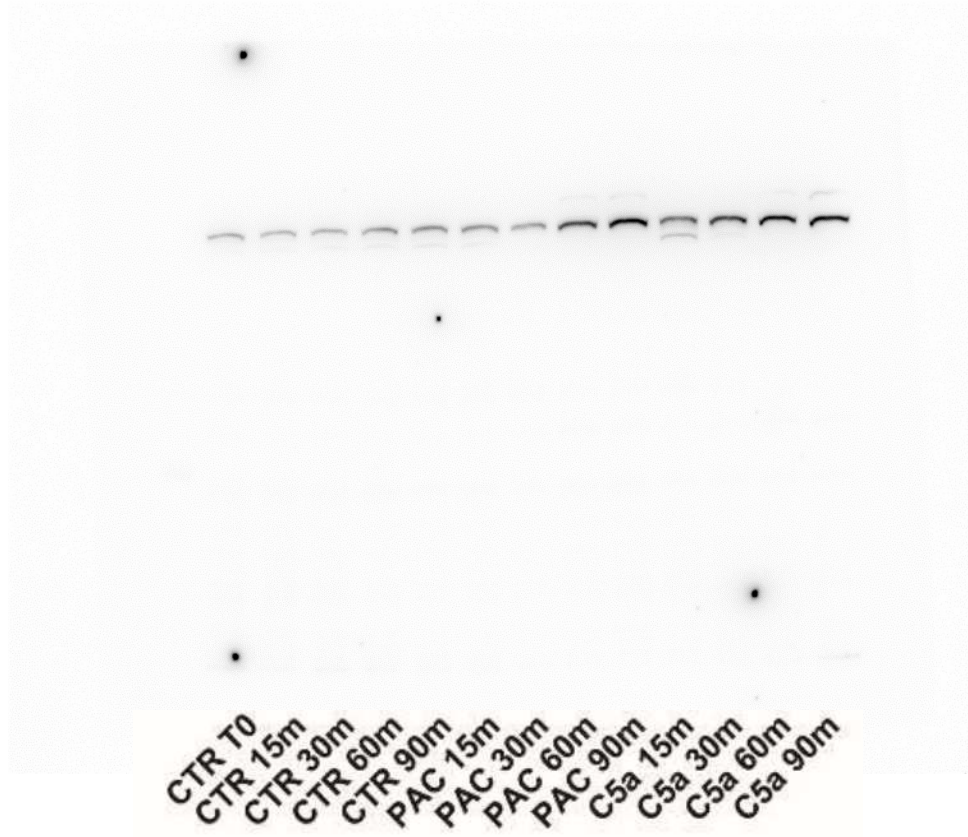

# Actin

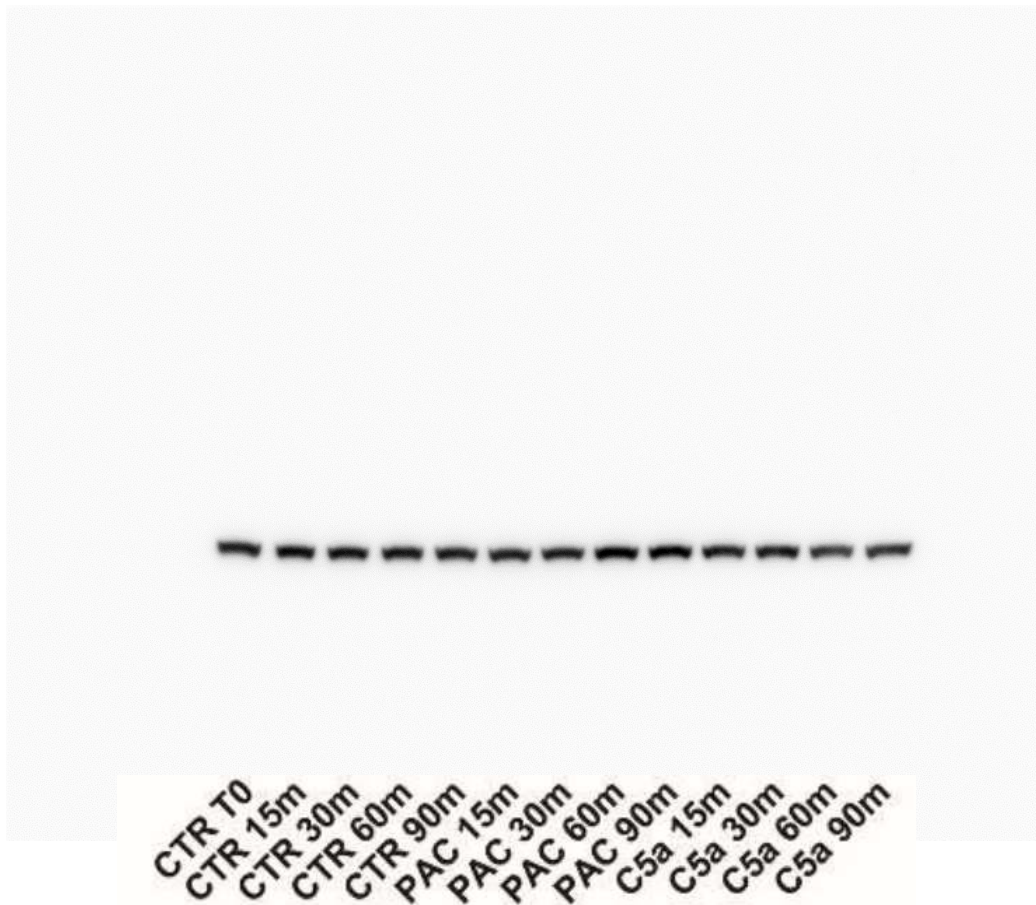



# p-MAPK

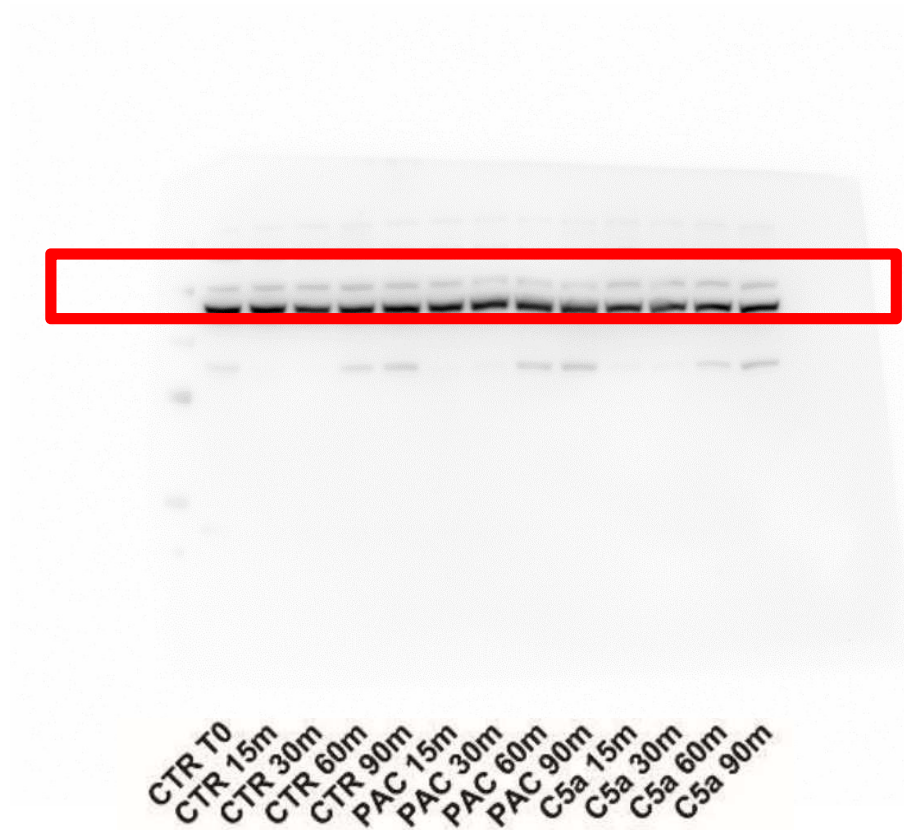

# Actin

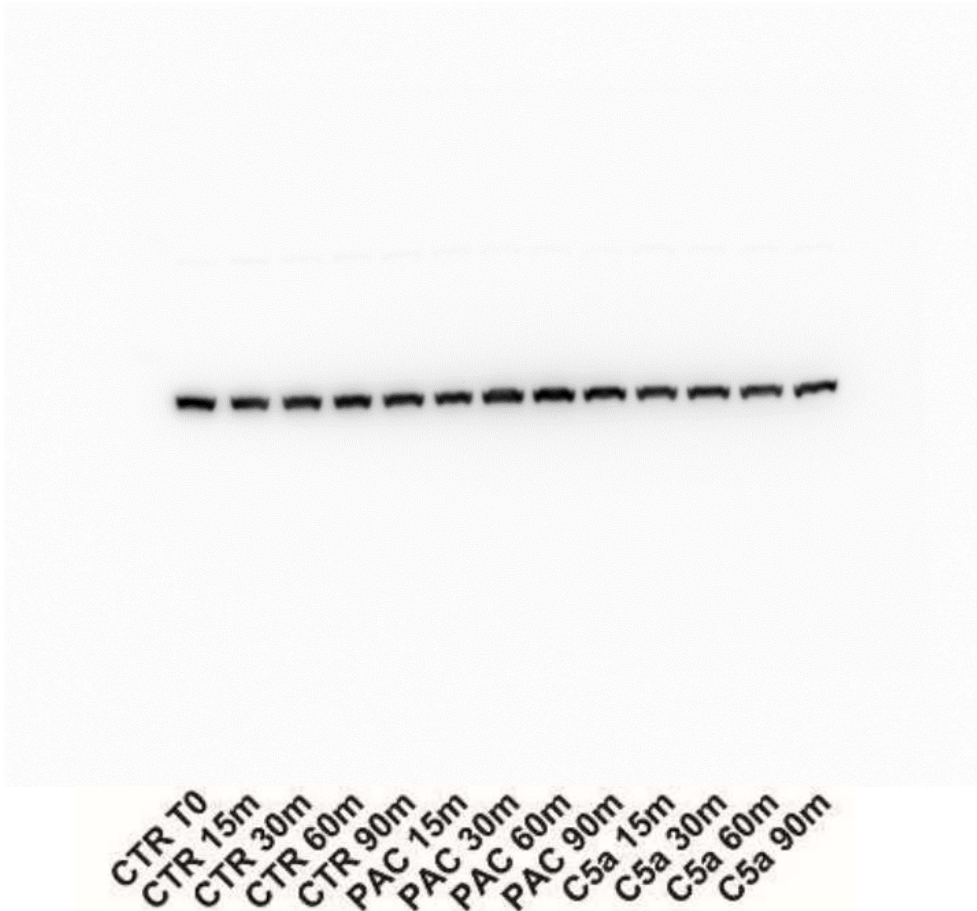

Full and uncropped western blot for Figure S4 A

C5aR1

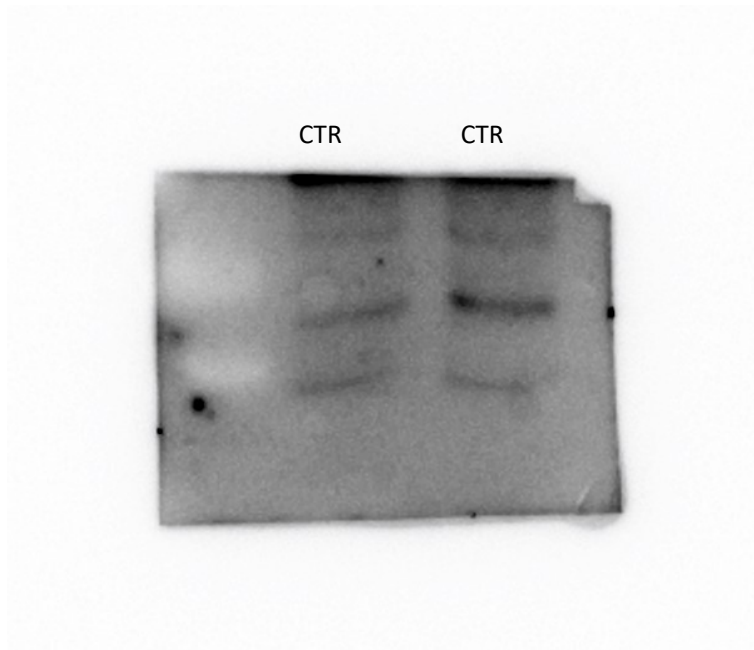

Actin

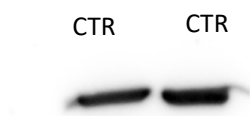

Full and uncropped western blot for **Figure S5**

p-Fak

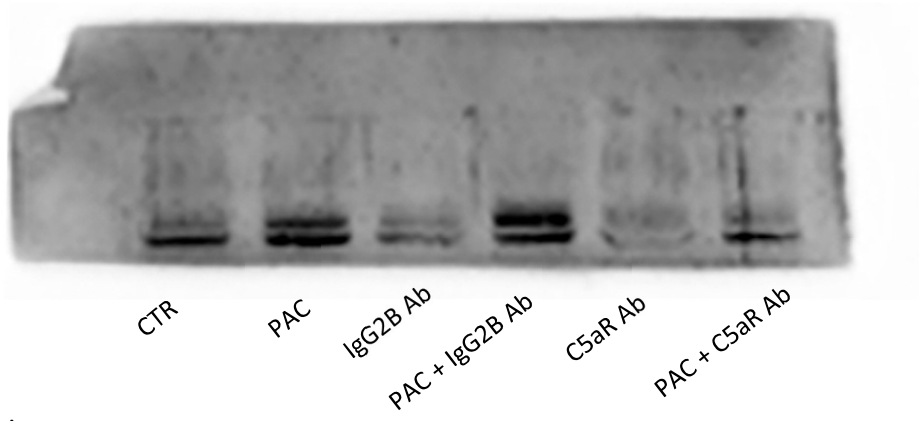

Actin

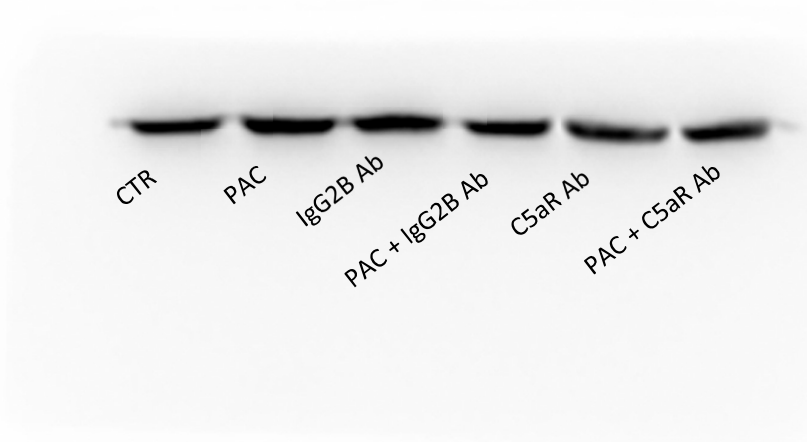

P-Jak2

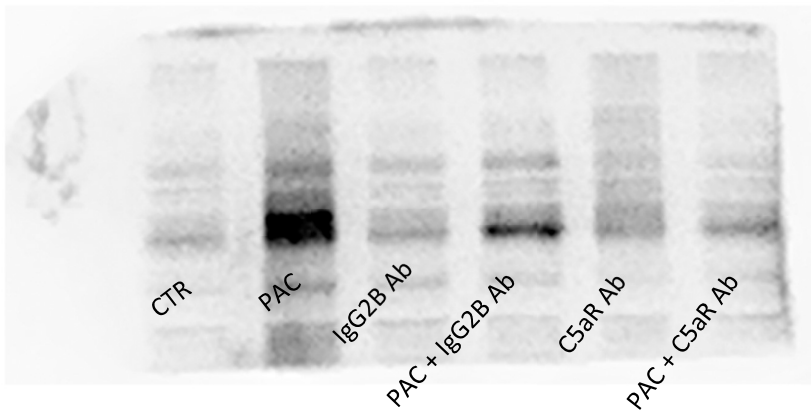

Actin

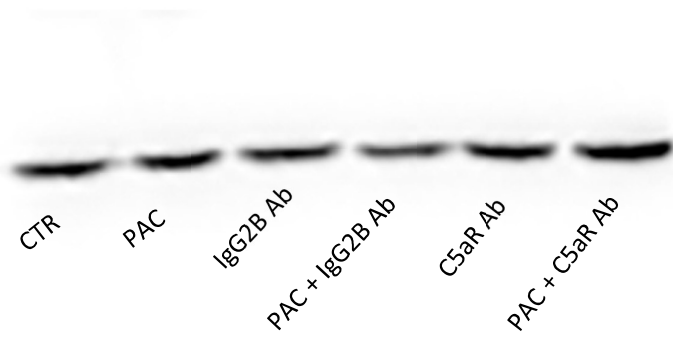

Supplement: 41419_2022_4964_MOESM2_ESM.pdf [file 41419_2022_4964_MOESM2_ESM.pdf]
